# Supplementary material for: Antibody and T-Cell Responses against SARS-CoV-2 after Booster Vaccination in Patients on Dialysis: A Prospective Observational Study
Source: MDPI journal article supplement (doi:10.3390/vaccines11020260), 2023-01-25
Supplement: s1 [file s1]

# Cohort Study on Vaccination Interval and Antibody Carriage Rate among Medical Care Providers and Elderly People in the Disaster Area of Fukushima Prefecture

What can you tell me about vaccines.

|                         |                                       |  |                         |  |  |  |
|-------------------------|---------------------------------------|--|-------------------------|--|--|--|
| Type of Vaccine         | Pfizer–BioNTech · Moderna · Other ( ) |  |                         |  |  |  |
| Date of 1st vaccination |                                       |  | Date of 2nd vaccination |  |  |  |

|                 |  |                       |  |               |
|-----------------|--|-----------------------|--|---------------|
| Pain            |  | Fever (<37.5°C)       |  | (symptoms : ) |
| Fever (≥37.5°C) |  | Malaise               |  |               |
| Headache        |  | Joint and muscle pain |  |               |
| Diarrhea        |  | Nausea                |  |               |
| Dizziness       |  | Other                 |  |               |

|                                                                                                  |                                                     |
|--------------------------------------------------------------------------------------------------|-----------------------------------------------------|
| Currently smoke cigarettes habitually                                                            | Yes · No                                            |
| Frequency of drinking alcohol (sake, shochu, beer, Western liquor) and other alcoholic beverages | Daily · Occasionally · Almost never                 |
| Amount of alcohol consumed per day (1 cup of sake = medium bottle of beer = 2 glasses of wine)   | Less than 1 cup · 1-2 cup · 2-3 cup · 3 cup or more |

|                                        |     |    |                                                 |
|----------------------------------------|-----|----|-------------------------------------------------|
| Steroids (excluding ointments)         | Yes | No | Drug name: Prednisone, Decadron, Lindelon, etc. |
| NSAIDs (Antipyretic analgesics)        | Yes | No | Drug Name:Loxonin,Ibuprofen,Celecox,etc.        |
| Acetaminophen (Antipyretic analgesics) | Yes | No | Drug Name:Koronal, etc.                         |
| Antihistamines (allergy medications)   | Yes | No | Drug Name:Allegra,Xyzal,Polaramine etc.         |
| Immunosuppressants                     | Yes | No | (name of a drug : )                             |
| Biologics                              | Yes | No | (name of a drug : )                             |
| Anticancer drugs                       | Yes | No | (name of a drug : )                             |

|                     |  |                        |  |
|---------------------|--|------------------------|--|
| COVID-19 (yourself) |  | COVID-19 (family)      |  |
| Hypertension        |  | Gout                   |  |
| Diabetes            |  | Hyperlipidemia         |  |
| Bronchial asthma    |  | Rheumatoid arthritis   |  |
| Anaphylaxis         |  | Respiratory disease    |  |
| mental disorder     |  | Cardiovascular disease |  |

|                                                                                                        | ○ | name of a disease |
|--------------------------------------------------------------------------------------------------------|---|-------------------|
| Collagen diseases other than rheumatoid arthritis (vasculitis, Behcet disease, scleroderma, SLE, etc.) |   |                   |
| Allergic diseases                                                                                      |   |                   |
| Immunodeficiency diseases (primary congenital immunodeficiency diseases, AIDS, etc.)                   |   |                   |
| Malignant tumors (hematologic tumors, solid tumors, etc.)                                              |   |                   |

**Japan Agency for Medical Research and Development Vaccine Development Promotion Project**  
Cohort Study on Vaccination Interval and Antibody Carriage Rate among Medical Care Providers and Elderly People in the Disaster Area of Fukushima Prefecture

|                                                                                       |  |  |
|---------------------------------------------------------------------------------------|--|--|
| Thyroid diseases (Graves' disease, hypothyroidism, thyroiditis, thyroid nodule, etc.) |  |  |
| Liver disease (chronic hepatitis, alcoholic hepatitis, cirrhosis, fatty liver, etc.)  |  |  |
| Kidney disease (IgA nephropathy, dialysis, nephrotic syndrome, etc.)                  |  |  |
| Other (please fill in all)                                                            |  |  |
